# Supplementary material for: Reliable evaluation of tumor-infiltrating lymphocytes in pancreatic cancer tissue biopsies
Source: PubMed Central journal article supplement (PMC6383689; doi:10.18632/oncotarget.26646), 2019-02-01
Supplement: oncotarget-10-1149-s001.pdf [file oncotarget-10-1149-s001.pdf]

## Reliable evaluation of tumor-infiltrating lymphocytes in pancreatic cancer tissue biopsies

### SUPPLEMENTARY MATERIALS

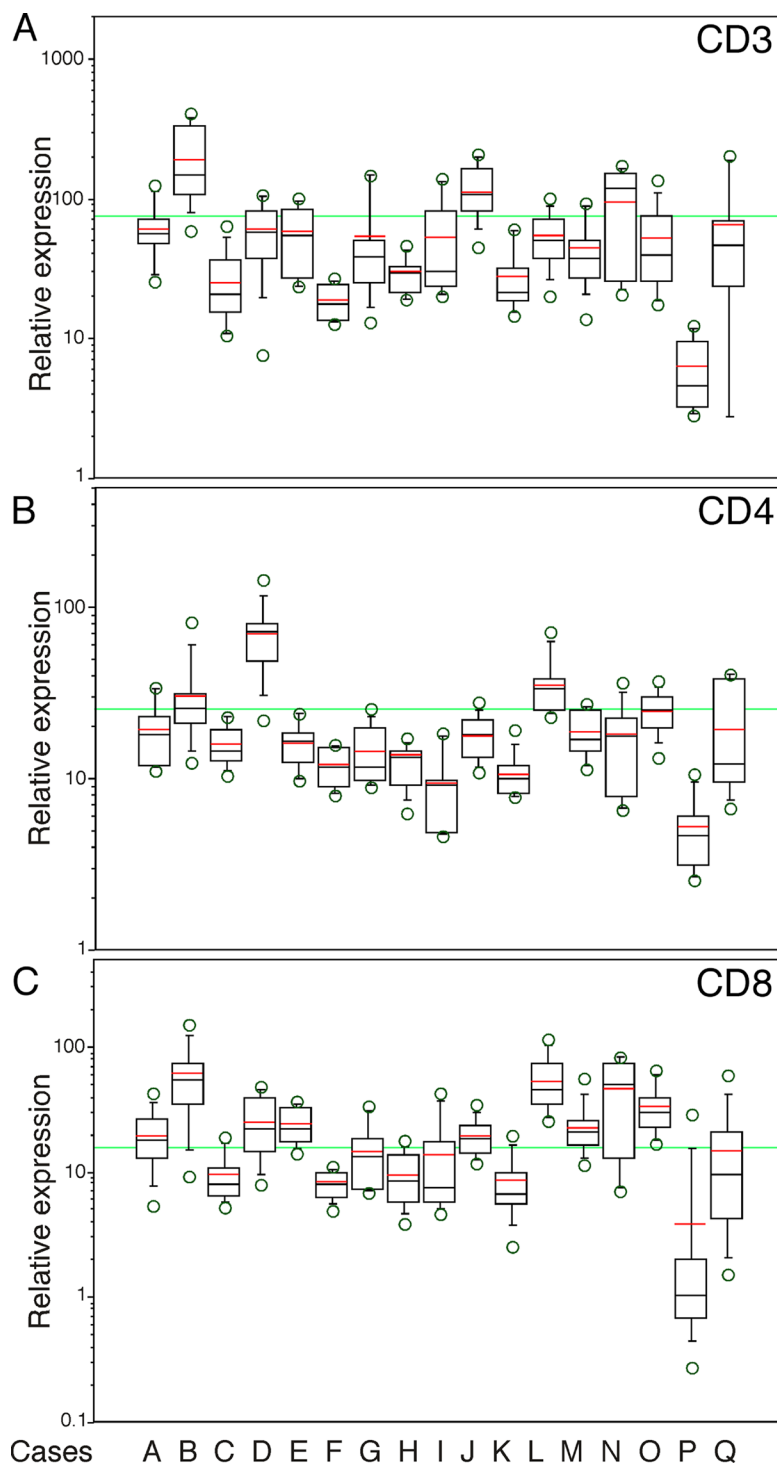

**Supplementary Figure 1:** Box plots for expression of *CD3* (A), *CD4* (B), and *CD8* (C) genes in PDAC biopsy tissues. The red line indicates the gene expression level in the corresponding surgically-resected tissue sample. The green line indicates the gene expression cut-off value set at the median of 241 cases of surgically-resected PDAC.

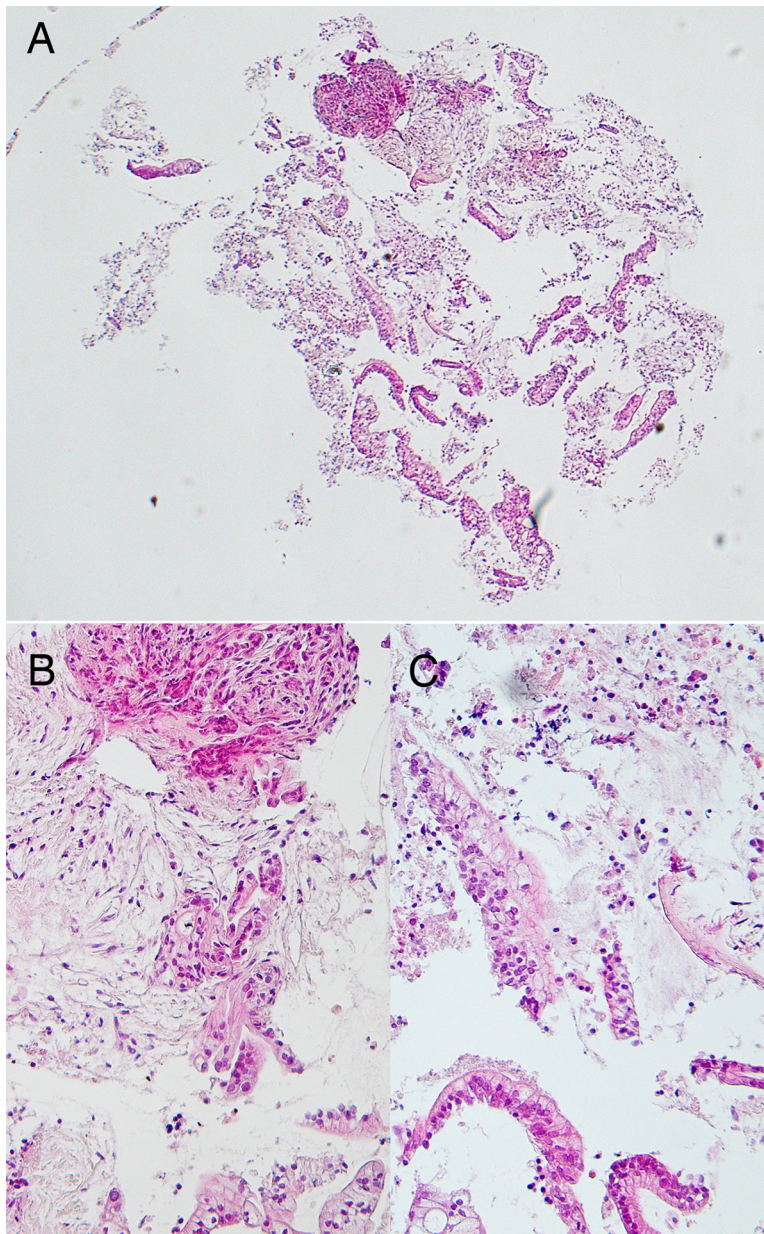

**Supplementary Figure 2: Representative biopsied materials stained with hematoxylin and eosin.** Only very small-sized and fragmented tissues and cells are obtained. Very low magnification (A) and low magnification (B, C).

**Supplementary Table 1: Median survival time, one-, two-, and five-year survival rate**

| Variables                  | Group | Overall survival                           |                   |             |             | Disease-free survival                      |                   |             |             |
|----------------------------|-------|--------------------------------------------|-------------------|-------------|-------------|--------------------------------------------|-------------------|-------------|-------------|
|                            |       | Median survival time <sup>a</sup> (months) | Survival rate (%) |             |             | Median survival time <sup>a</sup> (months) | Survival rate (%) |             |             |
|                            |       |                                            | 1-yr              | 2-yr        | 5-yr        |                                            | 1-yr              | 2-yr        | 5-yr        |
| Expression of <i>CD3</i>   | Low   | 24.3 ± 4.4                                 | 100               | 53.6 ± 20.0 | 53.6 ± 20.0 | 24.3 ± 4.4                                 | 100               | 53.6 ± 20.0 | 53.6 ± 20.0 |
|                            | High  | NA                                         | 100               | 83.3 ± 15.2 | 83.3 ± 15.2 | NA                                         | 100               | 83.3 ± 15.2 | 83.3 ± 15.2 |
| Expression of <i>CD4</i>   | Low   | 24.3 ± 4.0                                 | 100               | 51.4 ± 20.4 | 51.4 ± 20.4 | 24.3 ± 4.0                                 | 100               | 51.4 ± 20.4 | 51.4 ± 20.4 |
|                            | High  | NA                                         | 100               | 85.7 ± 13.2 | 85.7 ± 13.2 | NA                                         | 100               | 85.7 ± 13.2 | 85.7 ± 13.2 |
| Expression of <i>CD8</i>   | Low   | 24.3 ± 3.8                                 | 100               | 60.0 ± 21.9 | 60.0 ± 21.9 | 24.3 ± 3.8                                 | 100               | 60.0 ± 21.9 | 60.0 ± 21.9 |
|                            | High  | NA                                         | 100               | 75.0 ± 15.3 | 75.0 ± 15.3 | NA                                         | 100               | 75.0 ± 15.3 | 75.0 ± 15.3 |
| Expression of <i>FOXP3</i> | Low   | 24.3 ± 4.5                                 | 100               | 58.3 ± 18.6 | 58.3 ± 18.6 | 24.3 ± 4.5                                 | 100               | 58.3 ± 18.6 | 58.3 ± 18.6 |
|                            | High  | NA                                         | 100               | 83.3 ± 15.2 | 83.3 ± 15.2 | NA                                         | 100               | 83.3 ± 15.2 | 83.3 ± 15.2 |
| Ratio of <i>FOXP3/CD4</i>  | Low   | NA                                         | 100               | 72.9 ± 16.5 | 72.9 ± 16.5 | NA                                         | 100               | 72.9 ± 16.5 | 72.9 ± 16.5 |
|                            | High  | 24.3 ± 3.7                                 | 100               | 62.5 ± 21.4 | 62.5 ± 21.4 | 24.3 ± 3.7                                 | 100               | 62.5 ± 21.4 | 62.5 ± 21.4 |

Abbreviation: NA: not available, <sup>a</sup>median ± standard error.

**Supplementary Table 2: Clinicopathological characters of PDAC using biopsy model analysis**

|                                              |           |       |
|----------------------------------------------|-----------|-------|
| Age, years                                   | <65       | 8     |
|                                              | ≥65       | 9     |
| Gender                                       | Male      | 9     |
|                                              | Female    | 8     |
| Pathologic tumor status                      | T1a/1b/1c | 0/0/0 |
|                                              | T2        | 14    |
|                                              | T3        | 3     |
|                                              | T4        | 0     |
| Pathologic node status                       | N0        | 6     |
|                                              | N1        | 5     |
|                                              | N2        | 6     |
| Pathologic metastasis status                 | M0        | 15    |
|                                              | M1        | 2     |
| Stage                                        | IA        | 0     |
|                                              | IB        | 5     |
|                                              | IIA       | 1     |
|                                              | IIB       | 5     |
|                                              | III       | 4     |
|                                              | IV        | 2     |
| Tumor grade                                  | Grade 1   | 0     |
|                                              | Grade 2   | 13    |
|                                              | Grade 3   | 4     |
| Nerve plexus invasion <sup>a</sup>           | Absence   | 4     |
|                                              | Presence  | 13    |
| Lymphatic invasion <sup>a</sup>              | 0, 1      | 1     |
|                                              | 2, 3      | 16    |
| Venous invasion <sup>a</sup>                 | 0, 1      | 1     |
|                                              | 2, 3      | 16    |
| Intrapancreatic neural invasion <sup>a</sup> | 0, 1      | 3     |
|                                              | 2, 3      | 13    |
| Tumor margin status                          | Negative  | 13    |
|                                              | Positive  | 4     |
| Adjuvant chemotherapy                        | Negative  | 3     |
|                                              | Positive  | 14    |
| Total                                        |           | 17    |

<sup>a</sup>Classified according to the classification of pancreatic carcinoma of Japan Pancreas Society.

**Supplementary Table 3: Primer sequences and Universal Probe Library probes for quantitative RT-PCR**

| <b>Name of genes</b> | <b>Universal Probe Library Probe</b> | <b>Left primer</b>   | <b>Right primer</b>    |
|----------------------|--------------------------------------|----------------------|------------------------|
| <i>ACTB</i>          | #64                                  | CCAACCgCgAgAAgATgA   | TCCATCACgATgCCAgTg     |
| <i>CD3</i>           | #58                                  | TCCTTgCTgTTggggTCTAC | CgAgTCTgCTTgTCTgAAgCTC |
| <i>CD4</i>           | #18                                  | ggCAgTgTCTgCTgAgTgAC | gACCATgTgggCAgAACCT    |
| <i>CD8</i>           | #51                                  | TCATggCCTTACCAgTgACC | AggTTCCAaggTCCgATCC    |
| <i>FOXP3</i>         | #20                                  | gAgAAgCTgAgTgCCATgC  | AgCCCTTgTCggATgATg     |
